# Supplementary material
Source: Springer Nature journal article supplement (https://www.springermedizin.de/resource/supplementary/13011_2012_217_MOESM3_ESM.pdf/9628668)

### Males

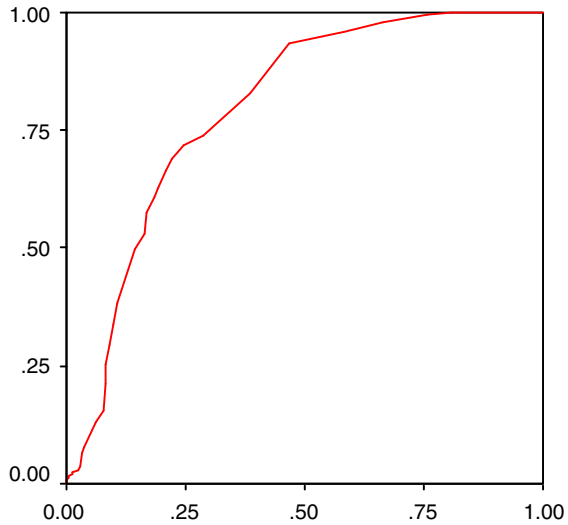

1 - Specificity

### Females

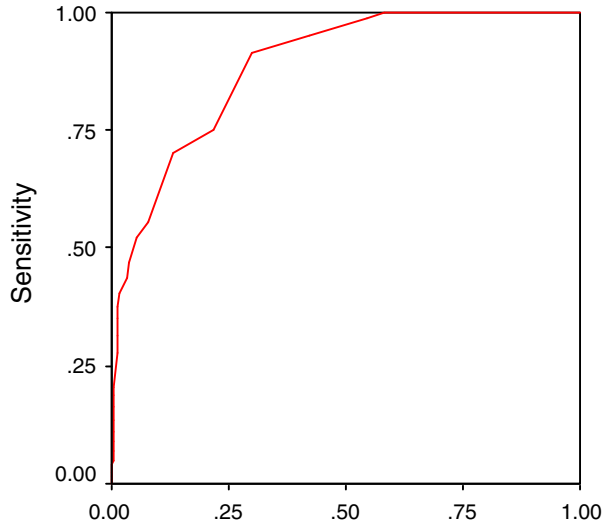

1 - Specificity

Supplement: MOESM3 [file 9628668]
